# Supplementary material
Source: PubMed Central journal article supplement (PMC6512321)
Supplement: NIHMS1016231-supplement-Supplementary_Inforamtion.pdf [file NIHMS1016231-supplement-Supplementary_Inforamtion.pdf]

## Supplementary Information

### Proteomic Identification of Protein Glutathionylation in Cardiomyocytes

Garrett C. VanHecke<sup>1</sup>, Maheeshi Yapa Abeywardana<sup>1</sup>, and Young-Hoon Ahn<sup>1\*</sup>

<sup>1</sup>Department of Chemistry, Wayne State University, Detroit, MI 48202, USA.

Corresponding author: Young-Hoon Ahn, [yahn@chem.wayne.edu](mailto:yahn@chem.wayne.edu); (313) 577-1384

#### Table of Contents:

**Figure S-1.** Investigation of levels of redox enzymes and cellular thiols.

**Figure S-2.** Detection of protein glutathionylation.

**Figure S-3.** A scheme of enrichment and elution of glutathionylated peptides.

**Figure S-4.** Optimization of elution and digestion of glutathionylated proteins.

**Figure S-5.** Detection of fragmentation of glutathione during LC-MS/MS analysis.

**Figure S-6.** Analysis of identified glutathionylated peptides

**Figure S-7.** STRING and cluster analysis of two merged networks.

**Figure S-8.** Analysis of glutathionylated Cys residues in Complex I supernumerary subunits.

**Figure S-9.** Analysis of glutathionylation in complex II.

**Table S-1:** A list of glutathionylated proteins and peptides in the positive and negative samples.

**Table S-2:** A list of 125 identified proteins that belong to both networks of 'glutathionylation' and 'cardiomyopathy'.

**Supplementary Methods:** cellular thiol concentrations, Western blotting, pull-down of glutathionylated proteins, and the sequence motif for glutathionylation.

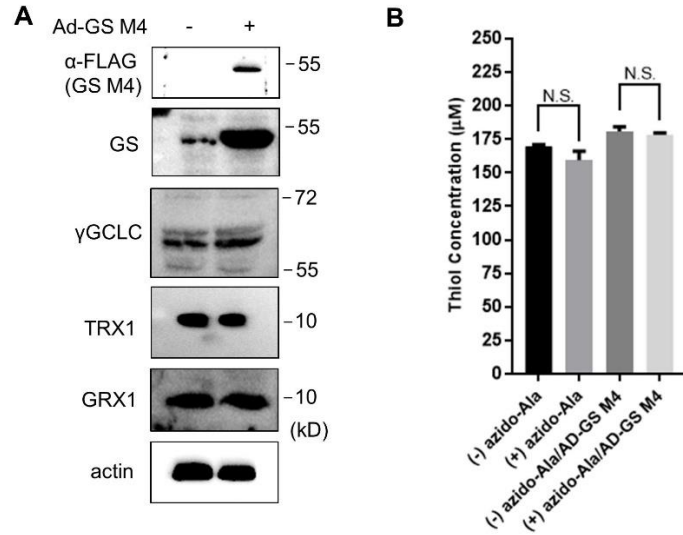

**Figure S-1. Investigation of levels of redox enzymes and cellular thiols upon application of a clickable glutathione approach.** HL-1 cells were infected by adenovirus expressing a mutant of glutathione synthetase (Ad-FLAG-GS M4) for 48 h. **(A)** Levels of GS M4, glutathione biosynthesis enzymes, such as glutathione synthetase (GS) and  $\gamma$ -glutamylcysteine ligase catalytic subunit (GCLC), and other redox enzymes. Lysates were analyzed by Western blots. Blots are the representation of at least 2 independent experiments. **(B)** A level of thiols in cells after expressing GS M4 and incubation of azido-Ala. Thiol concentrations in protein-free lysates were measured by bromobimane assay. Data represent the mean  $\pm$  SD, n = 2 independent experiments. Difference is significant by one-way ANOVA followed by Tukey's *post-hoc* test.

| A | Lane          | 1  | 2    | 3   | 4  | 5  | 6  | 7    | 8   | 9  | 10 |
|---|---------------|----|------|-----|----|----|----|------|-----|----|----|
|   | GS M4         | +  | +    | +   | +  | +  | +  | +    | +   | +  | +  |
|   | azido-Ala     | +  | +    | +   | +  | +  | +  | +    | +   | +  | +  |
|   | GluOx (units) | 0  | 0.06 | 0.6 | 6  | 60 | 0  | 0.06 | 0.6 | 6  | 60 |
|   | Time (min)    | 10 | 10   | 10  | 10 | 10 | 10 | 10   | 10  | 10 | 10 |
|   | Cy5-alkyne    | +  | +    | +   | +  | +  | +  | +    | +   | +  | +  |

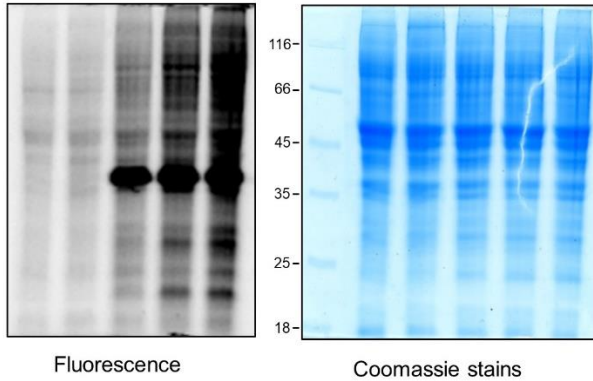

| B | Lane          | 1 | 2 | 3  | 4  | 5 | 6 | 7  | 8  |
|---|---------------|---|---|----|----|---|---|----|----|
|   | GS M4         | + | + | +  | +  | + | + | +  | +  |
|   | azido-Ala     | + | + | +  | +  | + | + | +  | +  |
|   | GluOx (units) | 6 | 6 | 6  | 6  | 6 | 6 | 6  | 6  |
|   | Time (min)    | 0 | 2 | 10 | 20 | 0 | 2 | 10 | 20 |
|   | Cy5-alkyne    | + | + | +  | +  | + | + | +  | +  |

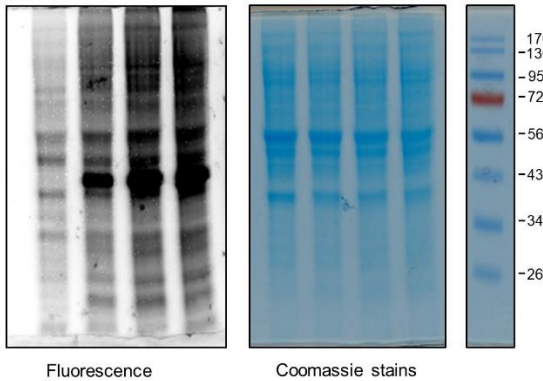

**C**

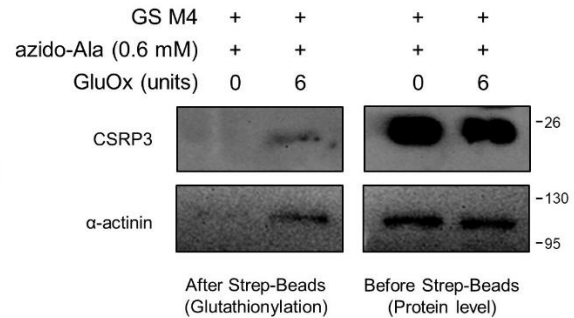

**Figure S-2. Detection of protein glutathionylation upon addition of glucose oxidase (GluOx).**

Glutathione synthetase mutant (GS M4) was expressed in HL-1 cells. After incubation of azido-Ala, cells were incubated with GluOx to induce glutathionylation. (A) Increasing concentrations of GluOx. (B) Increasing incubation times of GluOx. Collected lysates were subjected to click reaction with Cy5-alkyne, separated by SDS-PAGE, and examined for fluorescence or by Coomassie stains. (C) Identification of glutathionylation of specific proteins. After incubation of GluOx for 10 min, collected lysates were subjected to click reaction with biotin-alkyne. Biotinylated glutathionylated proteins were incubated with streptavidin-agarose (strep-beads) for 3 h, eluted by an SDS-loading buffer, and examined by Western blotting with specific antibodies to CSRP3 (Abcam, ab172952) or  $\alpha$ -actinin (Abcam, ab137346)

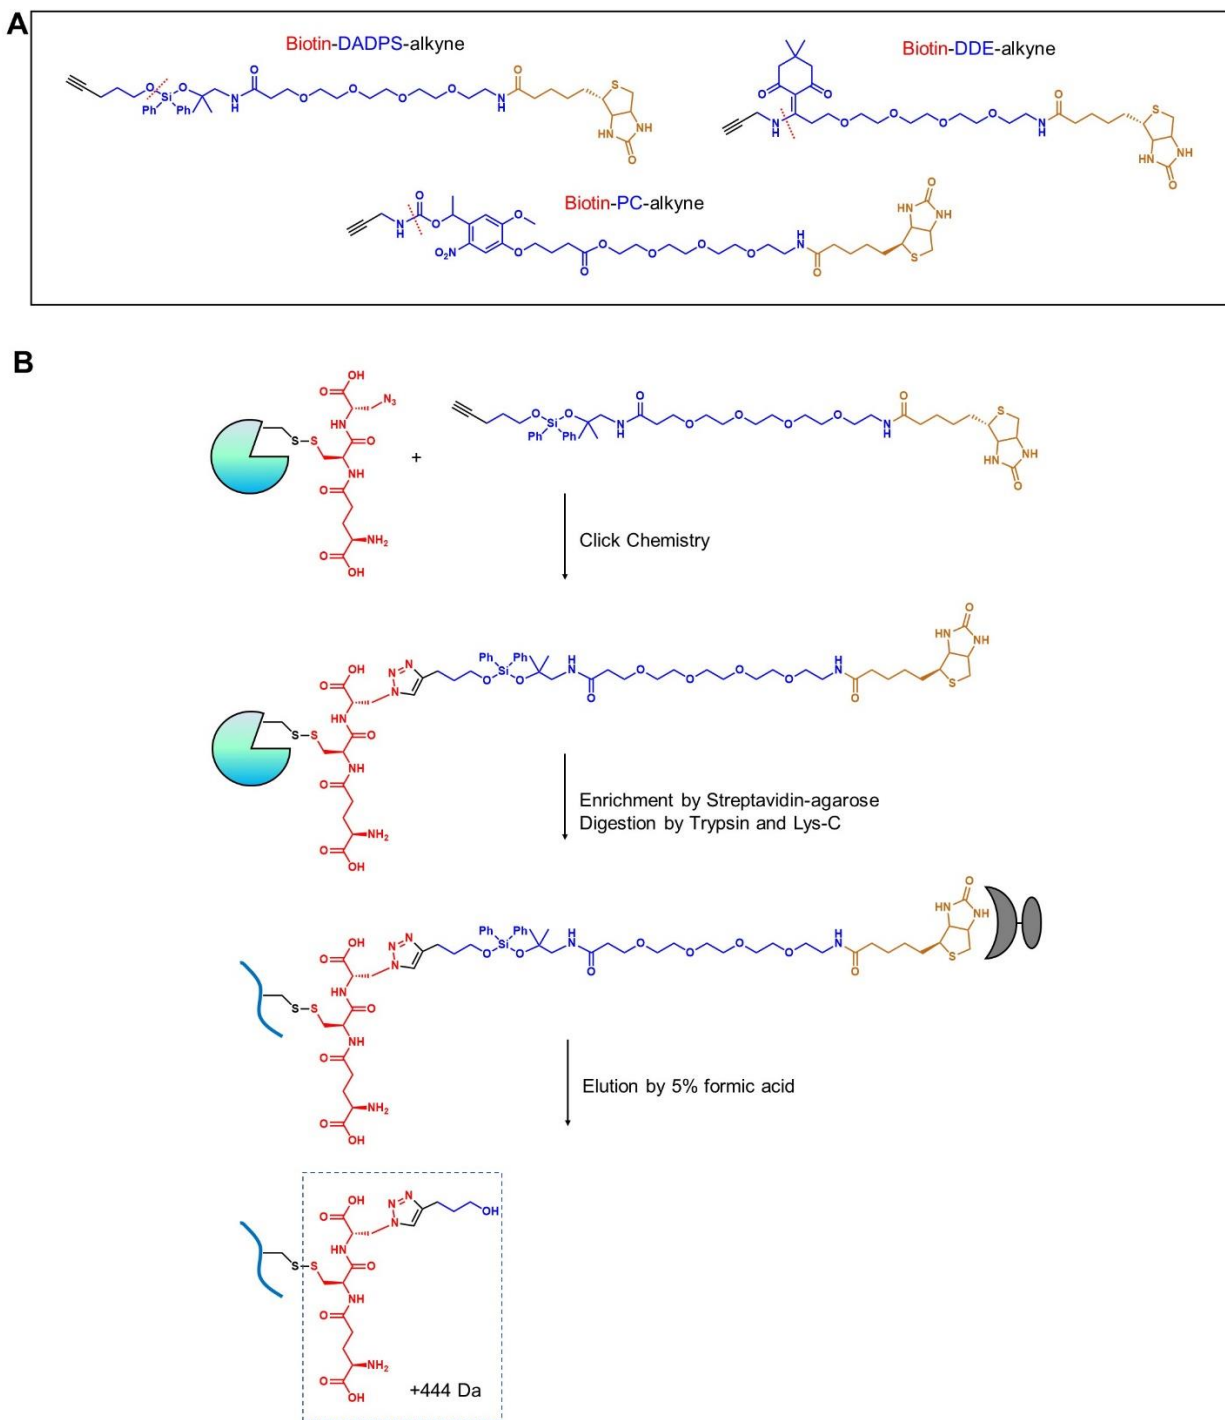

**Figure S-3. A scheme of enrichment and elution of glutathionylated peptides after click reaction with biotin-alkyne containing a cleavable linker. (A)** Biotin-alkyne derivatives with three different cleavable linkers. The cleavage site is shown by a red dotted line. **(B)** A scheme for identification of glutathionylated peptides by LC-MS/MS. After click reaction with biotin-DADPS-alkyne, biotinylated glutathionylated proteins were bound to streptavidin-agarose, digested by trypsin/Lys-C, eluted in an acidic condition, which leaves +444 Da modification on the Cys residue.

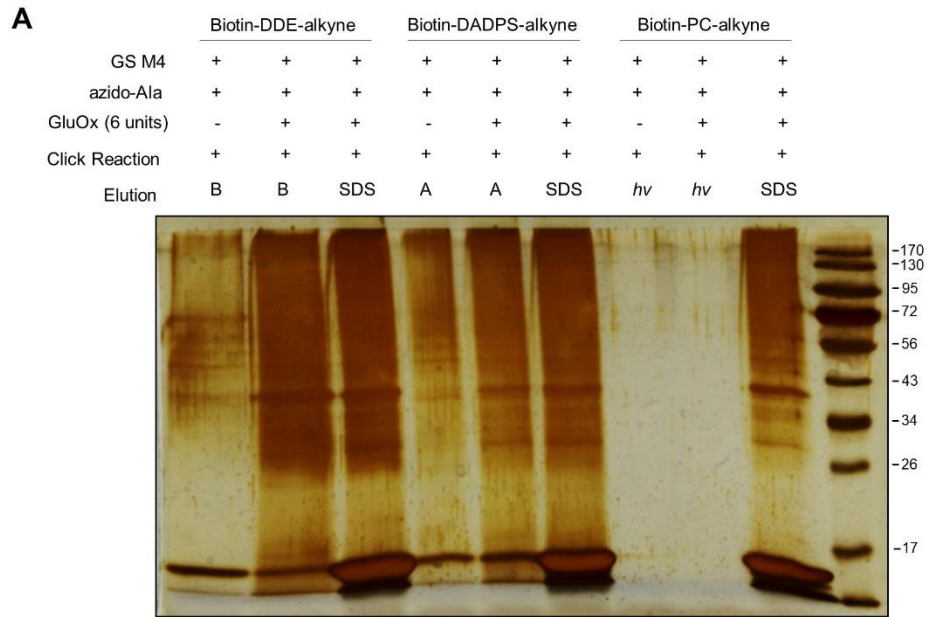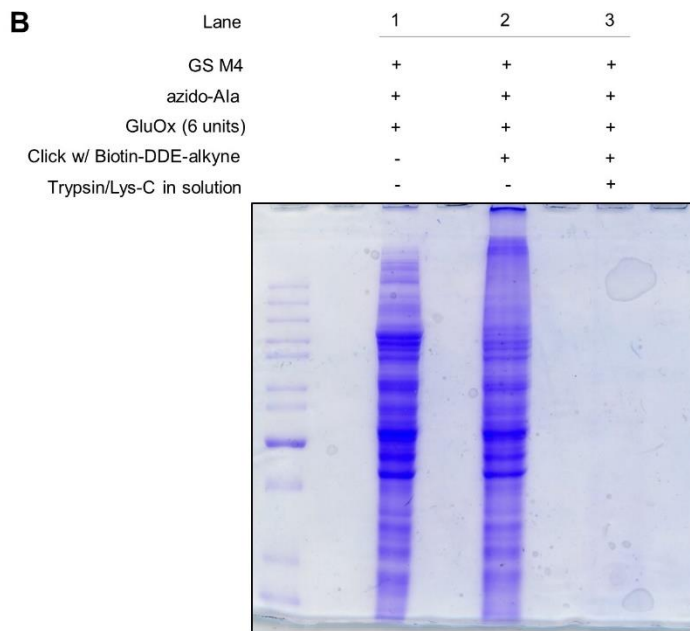

**Figure S-4. Optimization of elution and digestion of glutathionylated proteins.** (A) Elution of glutathionylated proteins. After click reaction with individual cleavable biotin-alkyne derivatives, glutathionylated proteins were bound to streptavidin-agarose and eluted in the specified conditions for 30 min twice: [A] acidic 10% aq. formic acid, [B] basic 2% hydrazine in PBS with 0.1% SDS, [*hν*] UV irradiation at 365 nm, [SDS] SDS-loading dye. Eluted proteins were analyzed by silver stains. (B) Digestion of glutathionylated proteins. Lysates containing glutathionylated proteins were precipitated by cold acetone and resuspended (lane 1), subjected to click reaction, followed by precipitation and resuspension (lane 2), and digested by Trypsin/Lys-C in resuspended solution (lane 3). The sample volume of resuspended solution was loaded and analyzed by SDS-PAGE and Coomassie stains.

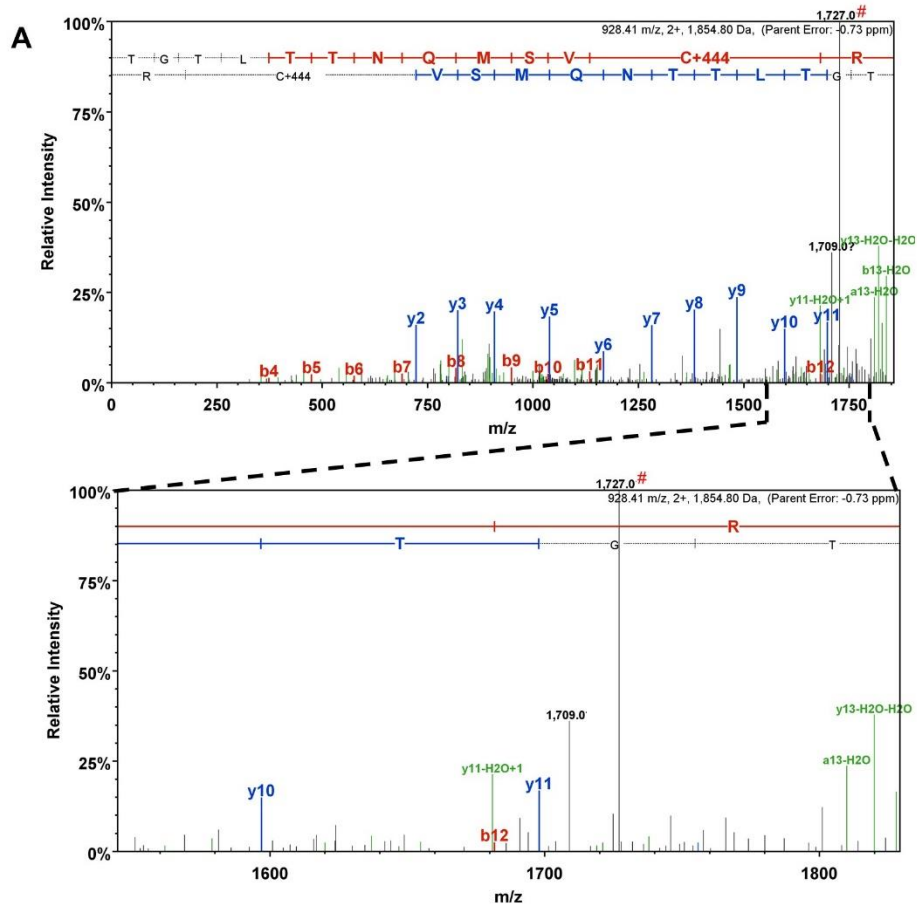

| B  | B Ions  | B+2H  | B-NH3   | B-H2O   | AA    | Y Ions  | Y+2H  | Y-NH3   | Y-H2O   | Y  |
|----|---------|-------|---------|---------|-------|---------|-------|---------|---------|----|
| 1  | 102.1   |       |         | 84.0    | T     | 1,855.8 | 928.4 | 1,838.8 | 1,837.8 | 13 |
| 2  | 159.1   |       |         | 141.1   | G     | 1,754.8 | 877.9 | 1,737.7 | 1,736.8 | 12 |
| 3  | 260.1   |       |         | 242.1   | T     | 1,697.7 | 849.4 | 1,680.7 | 1,679.7 | 11 |
| 4  | 373.2   |       |         | 355.2   | L     | 1,596.7 | 798.9 | 1,579.7 | 1,578.7 | 10 |
| 5  | 474.3   |       |         | 456.2   | T     | 1,483.6 | 742.3 | 1,466.6 | 1,465.6 | 9  |
| 6  | 575.3   | 288.2 |         | 557.3   | T     | 1,382.6 | 691.8 | 1,365.5 | 1,364.6 | 8  |
| 7  | 689.3   | 345.2 | 672.3   | 671.3   | N     | 1,281.5 | 641.3 | 1,264.5 | 1,263.5 | 7  |
| 8  | 817.4   | 409.2 | 800.4   | 799.4   | Q     | 1,167.5 | 584.2 | 1,150.4 | 1,149.5 | 6  |
| 9  | 948.4   | 474.7 | 931.4   | 930.4   | M     | 1,039.4 |       | 1,022.4 | 1,021.4 | 5  |
| 10 | 1,035.5 | 518.2 | 1,018.5 | 1,017.5 | S     | 908.4   |       | 891.3   | 890.4   | 4  |
| 11 | 1,134.5 | 567.8 | 1,117.5 | 1,116.5 | V     | 821.3   |       | 804.3   |         | 3  |
| 12 | 1,681.7 | 841.4 | 1,664.7 | 1,663.7 | C+444 | 722.3   |       | 705.2   |         | 2  |
| 13 | 1,855.8 | 928.4 | 1,838.8 | 1,837.8 | R     | 175.1   |       | 158.1   |         | 1  |

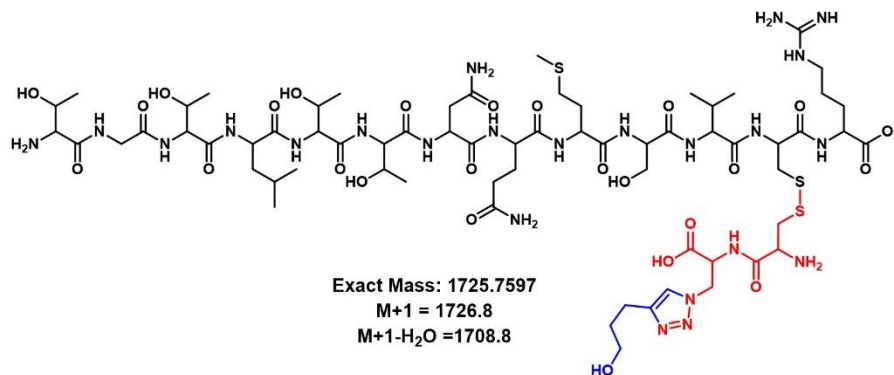

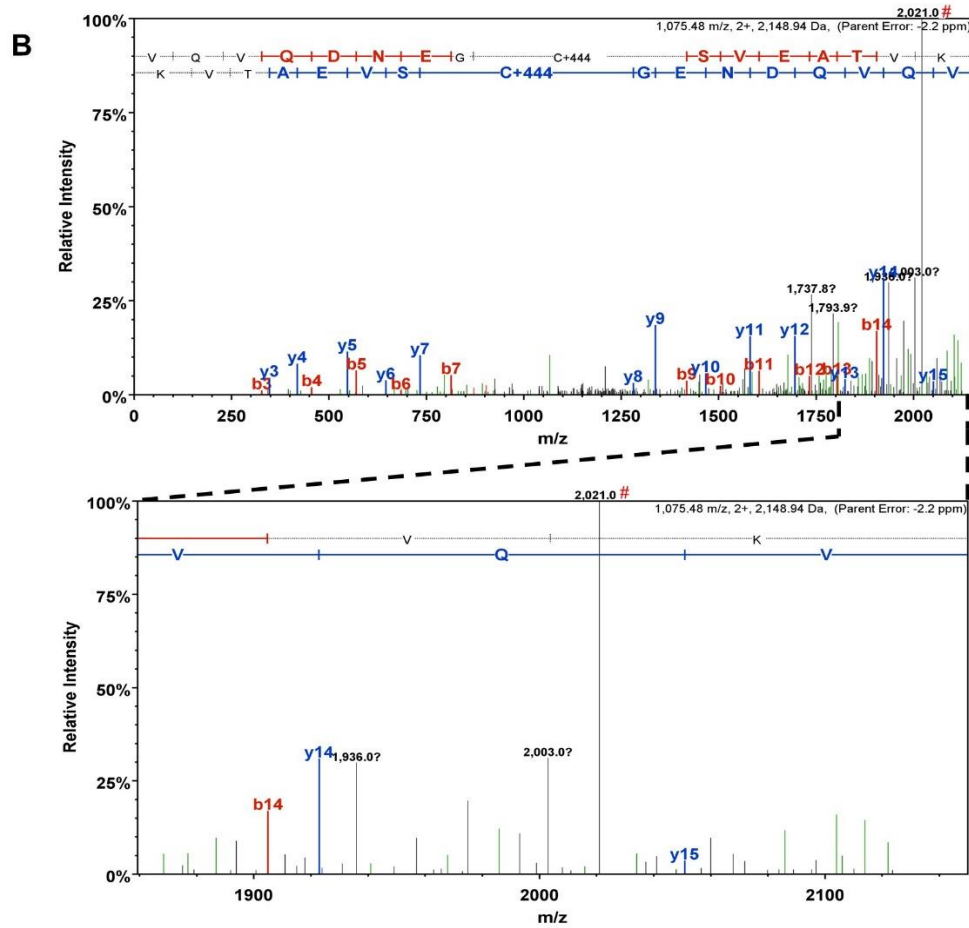

| B  | B Ions  | B+2H    | B-NH3   | B-H2O   | AA    | Y Ions  | Y+2H    | Y-NH3   | Y-H2O   | Y  |
|----|---------|---------|---------|---------|-------|---------|---------|---------|---------|----|
| 1  | 100.1   |         |         |         | V     | 2,149.9 | 1,075.5 | 2,132.9 | 2,131.9 | 16 |
| 2  | 228.1   |         | 211.1   |         | Q     | 2,050.9 | 1,025.9 | 2,033.9 | 2,032.9 | 15 |
| 3  | 327.2   |         | 310.2   |         | V     | 1,922.8 | 961.9   | 1,905.8 | 1,904.8 | 14 |
| 4  | 455.3   |         | 438.2   |         | Q     | 1,823.8 | 912.4   | 1,806.7 | 1,805.7 | 13 |
| 5  | 570.3   |         | 553.3   | 552.3   | D     | 1,695.7 | 848.4   | 1,678.7 | 1,677.7 | 12 |
| 6  | 684.3   | 342.7   | 667.3   | 666.3   | N     | 1,580.7 | 790.8   | 1,563.6 | 1,562.7 | 11 |
| 7  | 813.4   | 407.2   | 796.3   | 795.4   | E     | 1,466.6 | 733.8   | 1,449.6 | 1,448.6 | 10 |
| 8  | 870.4   | 435.7   | 853.4   | 852.4   | G     | 1,337.6 | 669.3   | 1,320.6 | 1,319.6 | 9  |
| 9  | 1,417.5 | 709.3   | 1,400.5 | 1,399.5 | C+444 | 1,280.6 | 640.8   | 1,263.5 | 1,262.6 | 8  |
| 10 | 1,504.6 | 752.8   | 1,487.6 | 1,486.6 | S     | 733.4   | 367.2   | 716.4   | 715.4   | 7  |
| 11 | 1,603.6 | 802.3   | 1,586.6 | 1,585.6 | V     | 646.4   | 323.7   | 629.4   | 628.4   | 6  |
| 12 | 1,732.7 | 866.8   | 1,715.7 | 1,714.7 | E     | 547.3   |         | 530.3   | 529.3   | 5  |
| 13 | 1,803.7 | 902.4   | 1,786.7 | 1,785.7 | A     | 418.3   |         | 401.2   | 400.3   | 4  |
| 14 | 1,904.8 | 952.9   | 1,887.7 | 1,886.8 | T     | 347.2   |         | 330.2   | 329.2   | 3  |
| 15 | 2,003.8 | 1,002.4 | 1,986.8 | 1,985.8 | V     | 246.2   |         | 229.2   |         | 2  |
| 16 | 2,149.9 | 1,075.5 | 2,132.9 | 2,131.9 | K     | 147.1   |         | 130.1   |         | 1  |

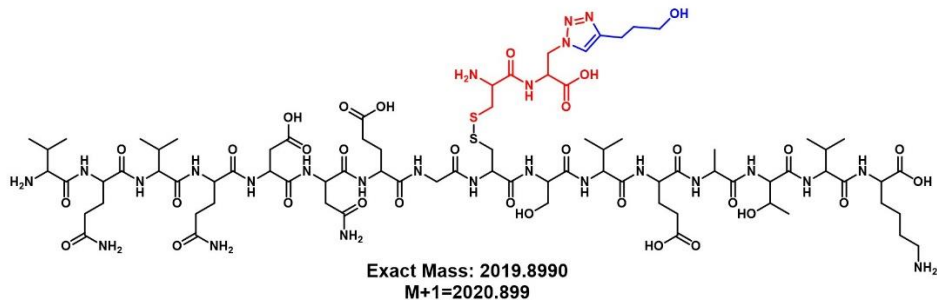

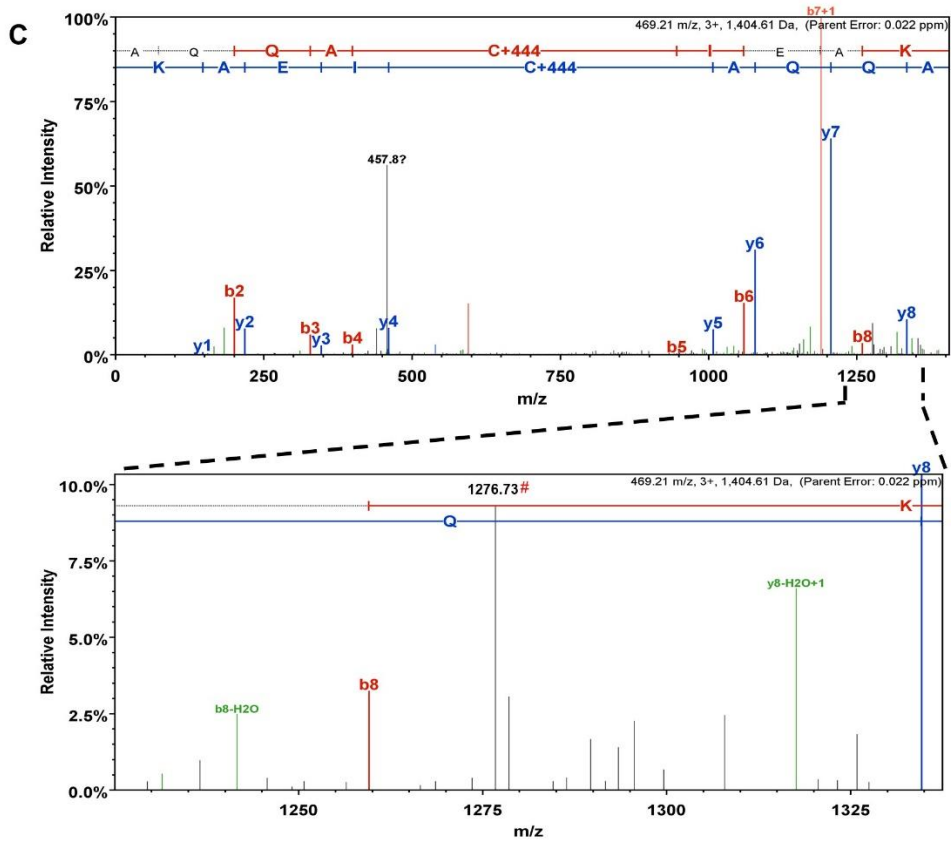

| B | B Ions  | B+2H  | B-NH3   | B-H2O   | AA    | Y Ions  | Y+2H  | Y-NH3   | Y-H2O   | Y |
|---|---------|-------|---------|---------|-------|---------|-------|---------|---------|---|
| 1 | 72.0    | 36.5  |         |         | A     | 1,405.6 | 703.3 | 1,388.6 | 1,387.6 | 9 |
| 2 | 200.1   | 100.6 | 183.1   |         | Q     | 1,334.6 | 667.8 | 1,317.6 | 1,316.6 | 8 |
| 3 | 328.2   | 164.6 | 311.1   |         | Q     | 1,206.5 | 603.8 | 1,189.5 | 1,188.5 | 7 |
| 4 | 399.2   | 200.1 | 382.2   |         | A     | 1,078.5 | 539.7 | 1,061.4 | 1,060.5 | 6 |
| 5 | 946.4   | 473.7 | 929.3   |         | C+444 | 1,007.4 | 504.2 | 990.4   | 989.4   | 5 |
| 6 | 1,059.4 | 530.2 | 1,042.4 |         | I     | 460.3   | 230.6 | 443.3   | 442.3   | 4 |
| 7 | 1,188.5 | 594.7 | 1,171.5 | 1,170.5 | E     | 347.2   | 174.1 | 330.2   | 329.2   | 3 |
| 8 | 1,259.5 | 630.3 | 1,242.5 | 1,241.5 | A     | 218.1   | 109.6 | 201.1   |         | 2 |
| 9 | 1,405.6 | 703.3 | 1,388.6 | 1,387.6 | K     | 147.1   | 74.1  | 130.1   |         | 1 |

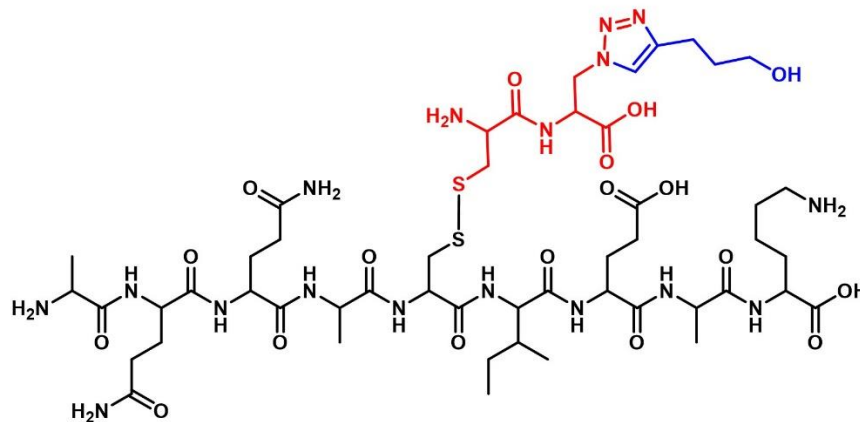

Exact Mass: 1275.5700  
M+1=1276.57



**Figure S-5. Detection of fragmentation of glutathione during LC-MS/MS analysis.** MS2 spectrums of three peptides, TGTLTTNQMSVC\*R from SERCA (**A**), VQVQDNEGC\*SV EATVK from Filamin A (**B**), and AQQAC\*IEAK from CHIP (**C**). In each protein (**A-C**), MS2 spectrums (top) of individual peptides are shown with an expanded area (the second from top) that show the peak (marked with #) corresponding to the identical peptides except with cleavage of  $\gamma$ -glutamyl-cysteine linkage on glutathione. Table shows the identified b or y ion peaks in each spectrum (the third from top). The structure and mass of identified peptides with the cleavage of  $\gamma$ -glutamyl-cysteine linkage are shown (bottom).

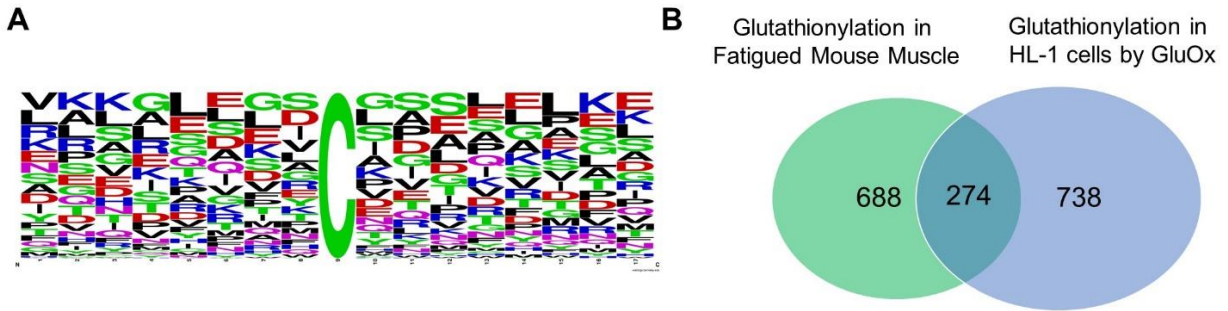

**Figure S-6. Analysis of identified glutathionylated peptides.** (A) Sequence motif analysis of glutathionylated peptides. 200 out of 1,767 identified glutathionylated peptides were randomly selected and aligned to show 17 amino acids containing Cys residue in the middle. These 200 peptide sequences were analyzed by WebLogo online tool (<https://weblogo.berkeley.edu/logo.cgi>) to generate the sequence motif. (B) Comparison of our list of glutathionylated proteins (1,012 proteins) with a previous report of glutathionylated proteins (962 proteins) from fatigue mouse skeletal muscle.<sup>1</sup> Accession numbers of our identified proteins were compared to the data available in reference 1.

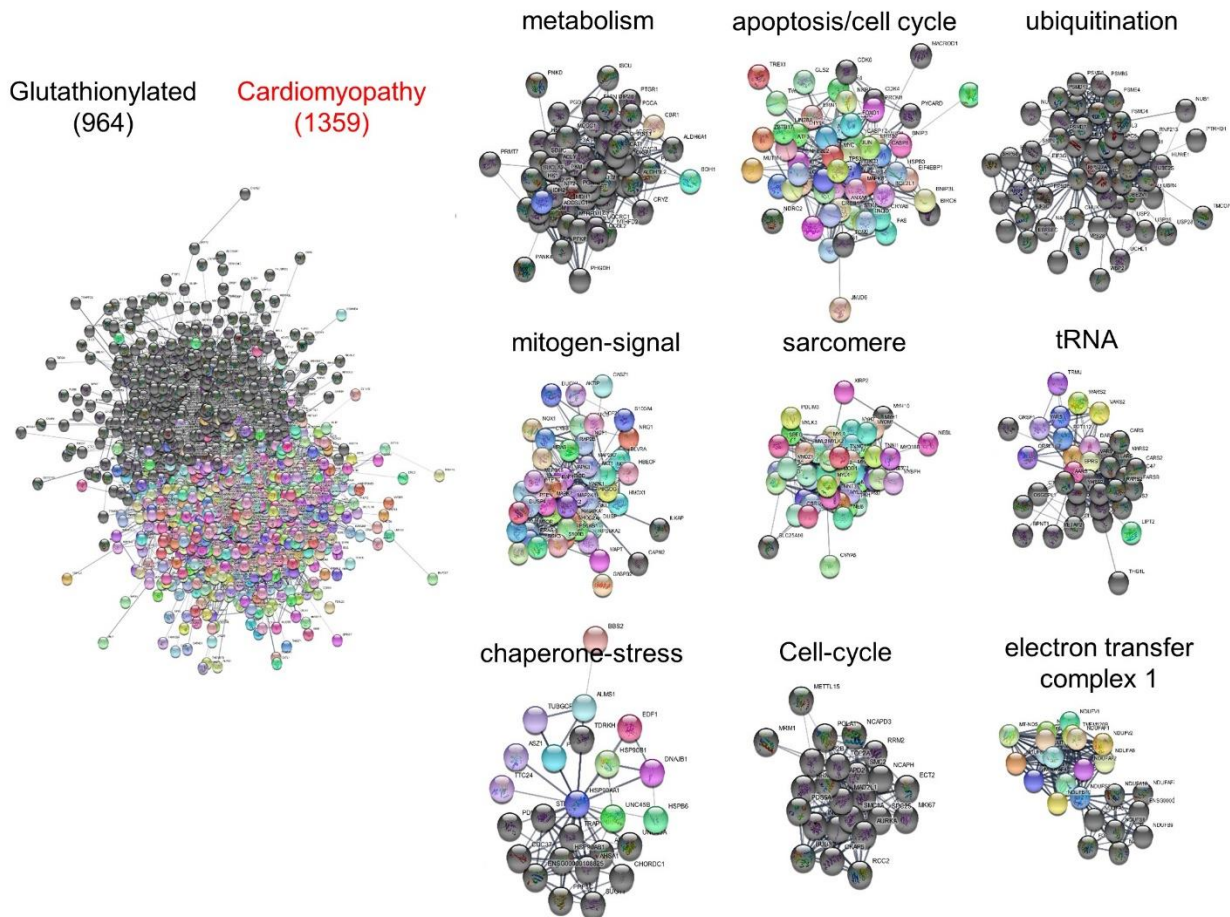

**Figure S-7. STRING and cluster analysis of two merged networks, ‘glutathionylated proteins’ and ‘cardiomyopathy-relevant gene’.** A list of glutathionylated proteins from mouse HL-1 cells were converted to human orthologs (964 proteins, black circle), which were merged with a list of genes (1,359 proteins, color circle) relevant to cardiomyopathy from STRING disease query. Two merged networks were clustered, and each cluster was assigned by the process associated with genes that belong to individual clusters.

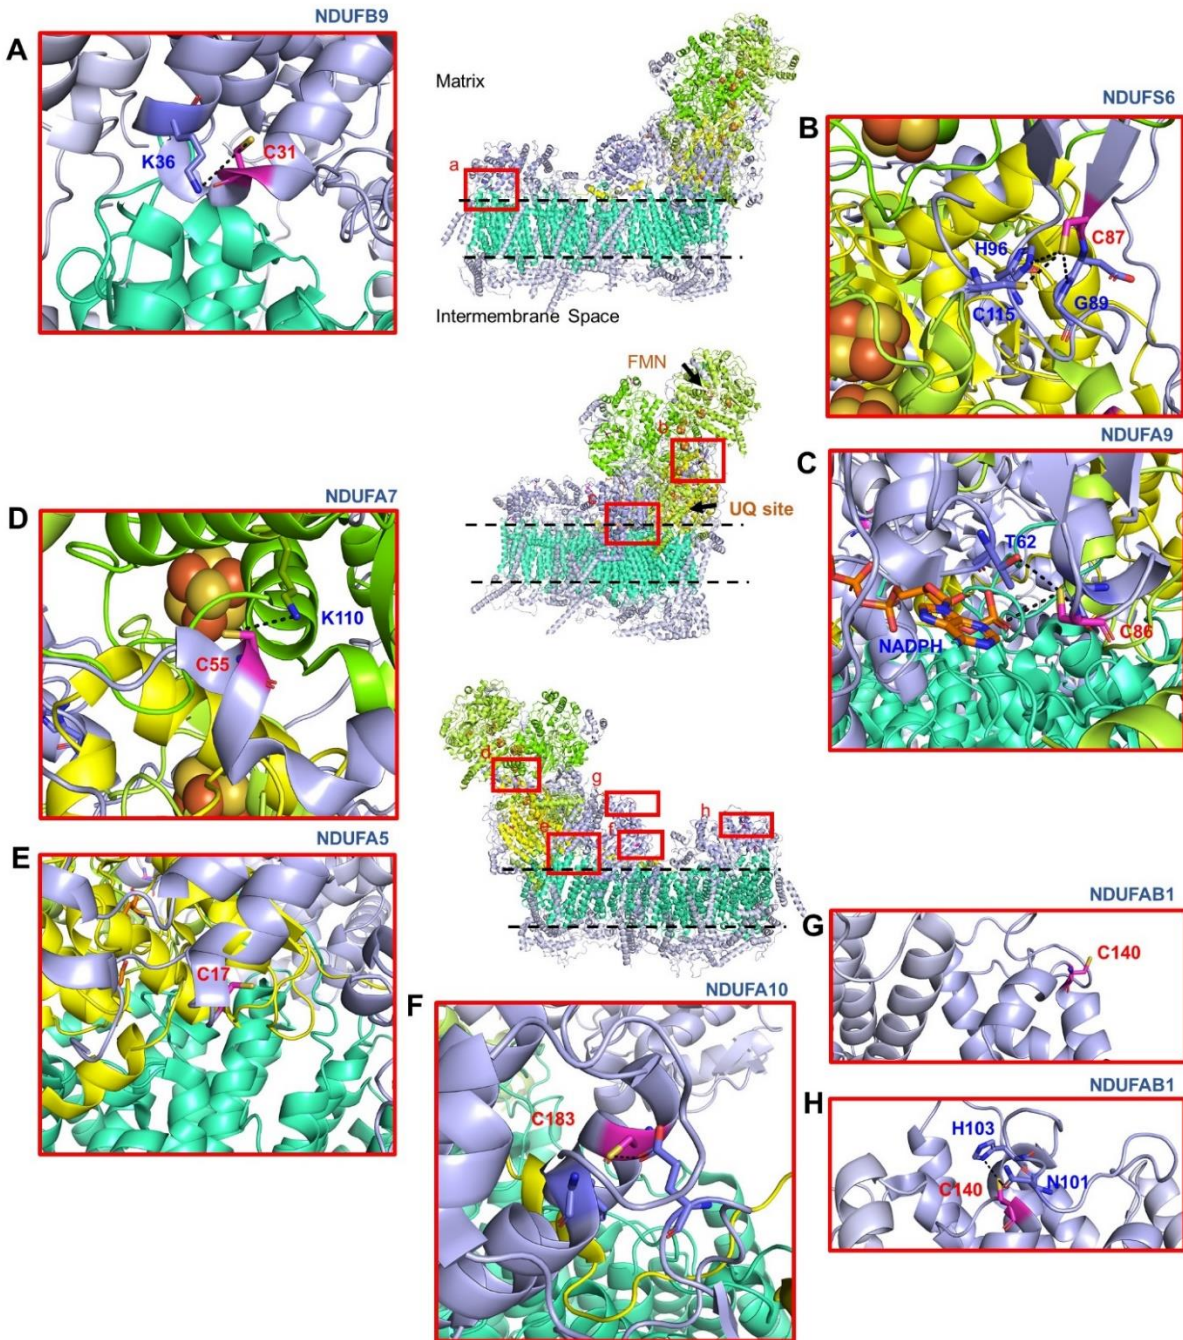

**Figure S-8. Analysis of glutathionylated Cys residues in Complex I supernumerary subunits.** A structure of bovine complex I (PDB: 5XTD) that contains 14 core subunits (7 cores in matrix, shown in lime, green, yellow, and 7 cores in membrane, shown in greencyan) and 31 supernumerary subunits (light blue). Glutathionylated Cys residues in supernumerary subunits are in rectangular boxes (a-h, red). (A-H) The enlarged structures of boxed areas (a-h), showing the position of glutathionylated Cys residues in supernumerary subunits. All numberings are based on the residue number in bovine complex I. Note that C87 in bovine NDUFS6 in (b) corresponds to C79 in mouse NDFUS6.

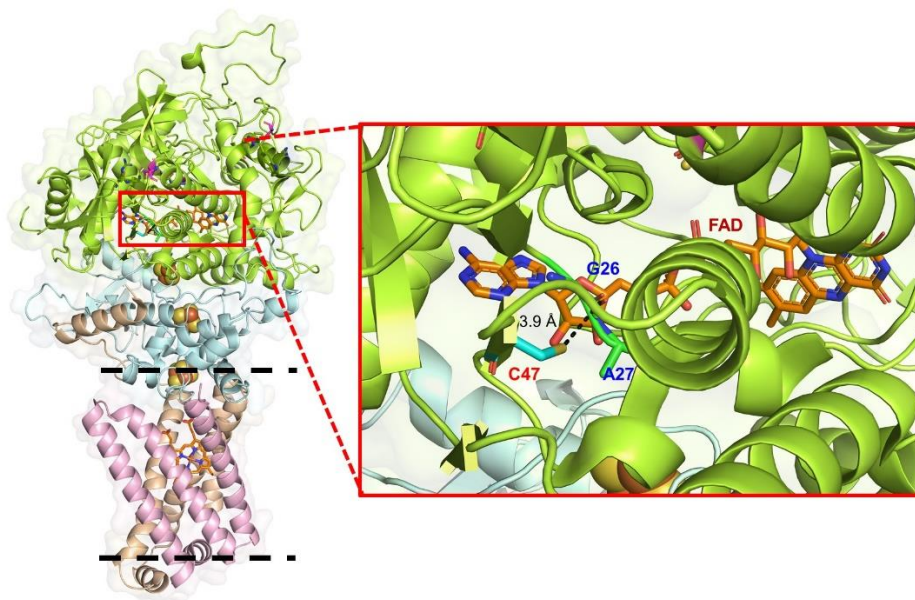

**Figure S-9. Analysis of glutathionylation of a previously reported Cys residue in complex II.** A structure of porcine complex II (PDB: 1ZOY) with SDHA subunit (green) that contains a previously reported glutathionylation at Cys 90,<sup>2</sup> which corresponds to Cys 47 in porcine structure.

**Table S2. A list of 125 identified proteins that belong to both networks of ‘glutathionylated proteins’ and ‘cardiomyopathy’**

|            | Gene     | Name                                                                                                             | Disease score |
|------------|----------|------------------------------------------------------------------------------------------------------------------|---------------|
| O95817     | BAG3     | BCL2-associated athanogene 3                                                                                     | 5.00          |
| P50461     | CSRP3    | cysteine and glycine-rich protein 3 (cardiac LIM protein)                                                        | 5.00          |
| Q8NEU6     | DES      | desmin                                                                                                           | 5.00          |
| P15924     | DSP      | desmoplakin                                                                                                      | 5.00          |
| Q5TCJ2     | LMNA     | lamin A/C                                                                                                        | 5.00          |
| A0A0C4DGG7 | LDB3     | LIM domain binding 3                                                                                             | 5.00          |
| Q14896     | MYBPC3   | myosin binding protein C, cardiac                                                                                | 5.00          |
| Q96DL0     | NEXN     | nexilin (F actin binding protein)                                                                                | 5.00          |
| P48544     | KCNJ5    | potassium inwardly-rectifying channel, subfamily J, member 5                                                     | 5.00          |
| Q92736     | RYR2     | ryanodine receptor 2 (cardiac)                                                                                   | 5.00          |
| Q13424     | SNTA1    | syntrophin, alpha 1                                                                                              | 5.00          |
| P42166     | TMPO     | thymopoietin                                                                                                     | 5.00          |
| P12235     | SLC25A4  | solute carrier family 25 (mitochondrial carrier; adenine nucleotide translocator), member 4                      | 4.37          |
| Q14315     | FLNC     | filamin C, gamma                                                                                                 | 4.33          |
| F8WCK2     | TSMF     | Ts translation elongation factor, mitochondrial                                                                  | 4.20          |
| P31040     | SDHA     | succinate dehydrogenase complex, subunit A, flavoprotein (Fp)                                                    | 4.19          |
| O60313     | OPA1     | optic atrophy 1 (autosomal dominant)                                                                             | 4.16          |
| P16615     | ATP2A2   | ATPase, Ca <sup>++</sup> transporting, cardiac muscle, slow twitch 2                                             | 2.15          |
| Q06124     | PTPN11   | protein tyrosine phosphatase, non-receptor type 11                                                               | 2.03          |
| H3BQA7     | OBSCN    | obscurin, cytoskeletal calmodulin and titin-interacting RhoGEF                                                   | 1.85          |
| P40939     | HADHA    | hydroxyacyl-CoA dehydrogenase/3-ketoacyl-CoA thiolase/enoyl-CoA hydratase (trifunctional protein), alpha subunit | 1.82          |
| O43772     | SLC25A20 | solute carrier family 25 (carnitine/acylcarnitine translocase), member 20                                        | 1.81          |
| P02144     | MB       | myoglobin                                                                                                        | 1.75          |
| P55084     | HADHB    | hydroxyacyl-CoA dehydrogenase/3-ketoacyl-CoA thiolase/enoyl-CoA hydratase (trifunctional protein), beta subunit  | 1.60          |
| Q8N904     | XIRP1    | xin actin-binding repeat containing 1                                                                            | 1.59          |
| O95822     | MLYCD    | malonyl-CoA decarboxylase                                                                                        | 1.54          |
| O43815     | STRN     | striatin, calmodulin binding protein                                                                             | 1.46          |
| P23381     | WARS     | tryptophanyl-tRNA synthetase                                                                                     | 1.44          |
| Q09EX5     | DYSF     | dysferlin, limb girdle muscular dystrophy 2B (autosomal recessive)                                               | 1.41          |
| P04406     | GAPDH    | glyceraldehyde-3-phosphate dehydrogenase                                                                         | 1.39          |
| P40763     | STAT3    | signal transducer and activator of transcription 3 (acute-phase response factor)                                 | 1.36          |
| Q92667     | AKAP1    | A kinase (PRKA) anchor protein 1                                                                                 | 1.34          |
| Q15796     | SMAD2    | SMAD family member 2                                                                                             | 1.34          |
| P34932     | HSPA4    | heat shock 70kDa protein 4                                                                                       | 1.34          |

|        |          |                                                                                             |      |
|--------|----------|---------------------------------------------------------------------------------------------|------|
| P10599 | TXN      | thioredoxin                                                                                 | 1.31 |
| P05091 | ALDH2    | aldehyde dehydrogenase 2 family (mitochondrial)                                             | 1.31 |
| Q13557 | CAMK2D   | calcium/calmodulin-dependent protein kinase II delta                                        | 1.27 |
| P08133 | ANXA6    | annexin A6                                                                                  | 1.25 |
| Q8IWX7 | UNC45B   | unc-45 homolog B (C. elegans)                                                               | 1.24 |
| Q9NZD0 | TP53     | tumor protein p53                                                                           | 1.24 |
| Q04446 | GBE1     | glucan (1,4-alpha-), branching enzyme 1                                                     | 1.23 |
| Q9UBG5 | MYLK     | myosin light chain kinase                                                                   | 1.23 |
| P09874 | PARP1    | poly (ADP-ribose) polymerase 1                                                              | 1.22 |
| A6NFY7 | SDHAF1   | succinate dehydrogenase complex assembly factor 1                                           | 1.20 |
| Q6PCB7 | SLC27A1  | solute carrier family 27 (fatty acid transporter), member 1                                 | 1.18 |
| O75127 | PTCD1    | pentatricopeptide repeat domain 1                                                           | 1.18 |
| Q13418 | ILK      | integrin-linked kinase                                                                      | 1.18 |
| P11216 | PYGB     | phosphorylase, glycogen; brain                                                              | 1.17 |
| Q86YB5 | KIAA0391 | KIAA0391                                                                                    | 1.17 |
| P27797 | CALR     | calreticulin                                                                                | 1.15 |
| P06732 | CKM      | creatine kinase, muscle                                                                     | 1.14 |
| Q96HG5 | ACTB     | actin, beta                                                                                 | 1.12 |
| Q53S33 | BOLA3    | bolA homolog 3 (E. coli)                                                                    | 1.12 |
| Q7L6B3 | DNM1L    | dynamamin 1-like                                                                            | 1.12 |
| P11142 | HSPA8    | heat shock 70kDa protein 8                                                                  | 1.11 |
| P30825 | SLC7A1   | solute carrier family 7 (cationic amino acid transporter, y+ system), member 1              | 1.10 |
| Q9NQC3 | RTN4     | reticulon 4                                                                                 | 1.09 |
| Q6S381 | PLEC     | plectin                                                                                     | 1.08 |
| Q96T22 | CASP8    | caspase 8, apoptosis-related cysteine peptidase                                             | 1.07 |
| Q04917 | YWHAH    | tyrosine 3-monooxygenase/tryptophan 5-monooxygenase activation protein, eta polypeptide     | 1.06 |
| Q5HYG0 | EIF4G1   | eukaryotic translation initiation factor 4 gamma, 1                                         | 1.05 |
| Q96HK4 | PRDX3    | peroxiredoxin 3                                                                             | 1.03 |
| Q02338 | BDH1     | 3-hydroxybutyrate dehydrogenase, type 1                                                     | 1.02 |
| P53701 | HCCS     | holocytochrome c synthase                                                                   | 1.00 |
| Q00325 | SLC25A3  | solute carrier family 25 (mitochondrial carrier; phosphate carrier), member 3               | 0.98 |
| P12829 | MYL4     | myosin, light chain 4, alkali; atrial, embryonic                                            | 0.96 |
| O14558 | HSPB6    | heat shock protein, alpha-crystallin-related, B6                                            | 0.95 |
| P13535 | MYH8     | myosin, heavy chain 8, skeletal muscle, perinatal                                           | 0.89 |
| P07900 | HSP90AA1 | heat shock protein 90kDa alpha (cytosolic), class A member 1                                | 0.88 |
| Q15942 | ZYX      | zyxin                                                                                       | 0.86 |
| Q01449 | MYL7     | myosin, light chain 7, regulatory                                                           | 0.86 |
| P16152 | CBR1     | carbonyl reductase 1                                                                        | 0.86 |
| P50552 | VASP     | vasodilator-stimulated phosphoprotein                                                       | 0.85 |
| Q7M4R4 | YWHAE    | tyrosine 3-monooxygenase/tryptophan 5-monooxygenase activation protein, epsilon polypeptide | 0.85 |
| Q13496 | MTM1     | myotubularin 1                                                                              | 0.85 |

|        |          |                                                                                             |      |
|--------|----------|---------------------------------------------------------------------------------------------|------|
| P68104 | EEF1A1   | eukaryotic translation elongation factor 1 alpha 1                                          | 0.84 |
| P12814 | ACTN1    | actinin, alpha 1                                                                            | 0.83 |
| Q9UDE8 | LDHA     | lactate dehydrogenase A                                                                     | 0.83 |
| P11474 | ESRRA    | estrogen-related receptor alpha                                                             | 0.83 |
| Q7Z3X1 | IMMT     | inner membrane protein, mitochondrial                                                       | 0.82 |
| P30084 | ECHS1    | enoyl CoA hydratase, short chain, 1, mitochondrial                                          | 0.81 |
| P42704 | LRPPRC   | leucine-rich pentatricopeptide repeat containing                                            | 0.81 |
| Q9UL46 | PSME2    | proteasome (prosome, macropain) activator subunit 2 (PA28 beta)                             | 0.81 |
| O94901 | SUN1     | Sad1 and UNC84 domain containing 1                                                          | 0.79 |
| P50570 | DNM2     | dynammin 2                                                                                  | 0.78 |
| P05141 | SLC25A5  | solute carrier family 25 (mitochondrial carrier; adenine nucleotide translocator), member 5 | 0.77 |
| P26640 | VARS     | valyl-tRNA synthetase                                                                       | 0.77 |
| P22033 | MUT      | methylmalonyl CoA mutase                                                                    | 0.76 |
| Q9BT17 | GTP      | Mitochondrial GTPase 1                                                                      | 0.75 |
| O75306 | NDUFS2   | NADH dehydrogenase (ubiquinone) Fe-S protein 2, 49kDa (NADH-coenzyme Q reductase)           | 0.74 |
| Q9Y4R1 | SYNE2    | spectrin repeat containing, nuclear envelope 2                                              | 0.74 |
| P45974 | USP5     | ubiquitin specific peptidase 5 (isopeptidase T)                                             | 0.73 |
| P55884 | EIF3B    | eukaryotic translation initiation factor 3, subunit B                                       | 0.72 |
| P63261 | ACTG1    | actin, gamma 1                                                                              | 0.71 |
| Q9H9J2 | MRPL44   | mitochondrial ribosomal protein L44                                                         | 0.70 |
| P42226 | STAT6    | signal transducer and activator of transcription 6, interleukin-4 induced                   | 0.70 |
| Q9UNE7 | STUB1    | STIP1 homology and U-box containing protein 1, E3 ubiquitin protein ligase                  | 0.68 |
| P17540 | CKMT2    | creatine kinase, mitochondrial 2 (sarcomeric)                                               | 0.68 |
| Q9Y613 | FHOD1    | formin homology 2 domain containing 1                                                       | 0.67 |
| P20073 | ANXA7    | annexin A7                                                                                  | 0.65 |
| P62633 | CNBP     | CCHC-type zinc finger, nucleic acid binding protein                                         | 0.63 |
| P28482 | MAPK1    | mitogen-activated protein kinase 1                                                          | 0.63 |
| Q86X73 | EPRS     | glutamyl-prolyl-tRNA synthetase                                                             | 0.63 |
| P35221 | CTNNA1   | catenin (cadherin-associated protein), alpha 1, 102kDa                                      | 0.62 |
| P60604 | UBE2G2   | ubiquitin-conjugating enzyme E2G 2                                                          | 0.62 |
| P48735 | IDH2     | isocitrate dehydrogenase 2 (NADP+), mitochondrial                                           | 0.61 |
| O43583 | DENR     | density-regulated protein                                                                   | 0.60 |
| Q9BQ52 | ELAC2    | elaC homolog 2 (E. coli)                                                                    | 0.60 |
| O60664 | PLIN3    | perilipin 3                                                                                 | 0.59 |
| O60841 | EIF5B    | eukaryotic translation initiation factor 5B                                                 | 0.59 |
| O75116 | ROCK2    | Rho-associated, coiled-coil containing protein kinase 2                                     | 0.59 |
| Q13541 | EIF4EBP1 | eukaryotic translation initiation factor 4E binding protein 1                               | 0.59 |
| Q9UEQ5 | RBM25    | RNA binding motif protein 25                                                                | 0.58 |
| Q32MK0 | MYLK3    | myosin light chain kinase 3                                                                 | 0.56 |
| Q9Y490 | TLN1     | talin 1                                                                                     | 0.55 |



|        |         |                                                                                                   |      |
|--------|---------|---------------------------------------------------------------------------------------------------|------|
| Q6PI48 | DARS2   | aspartyl-tRNA synthetase 2, mitochondrial                                                         | 0.55 |
| P21399 | ACO1    | aconitase 1, soluble                                                                              | 0.55 |
| O14980 | XPO1    | exportin 1 (CRM1 homolog, yeast)                                                                  | 0.55 |
| P51532 | SMARCA4 | SWI/SNF related, matrix associated, actin dependent regulator of chromatin, subfamily a, member 4 | 0.54 |
| Q14318 | FKBP8   | FK506 binding protein 8, 38kDa                                                                    | 0.54 |
| Q9BT27 | MYH14   | myosin, heavy chain 14, non-muscle                                                                | 0.54 |
| Q9NW42 | IARS2   | isoleucyl-tRNA synthetase 2, mitochondrial                                                        | 0.53 |
| Q99615 | DNAJC7  | DnaJ (Hsp40) homolog, subfamily C, member 7                                                       | 0.51 |
| P13639 | EEF2    | eukaryotic translation elongation factor 2                                                        | 0.51 |
| P60660 | MYL6    | myosin, light chain 6, alkali, smooth muscle and non-muscle                                       | 0.50 |

## Supplementary Methods

**Cellular thiol concentration.** Experiment was done as reported previously.<sup>3,4</sup> Briefly, HL-1 cells with and without infection with Ad-GS M4 were treated with 0.6 mM azido-Ala for 24 h and washed with PBS. Cells were then collected and lysed in PBS by freeze-thaw cycles (x3). Lysates were collected after centrifugation. Lysates were centrifuged with 3K centrifugal filter device to remove proteins, and the filtrate (protein-free lysates) was collected. The total thiol contents were analyzed by fluorescence assay using bromobimane (excitation - 390 nm, emission- 478 nm). Bromobimane assay was performed in the following condition: 0.1 M phosphate buffer, 0.5 mM bromobimane, and 10  $\mu$ L of filtrate. The fluorescence signal was measured by using a plate reader. All the data was duplicated, and the background signal was corrected.

**Western blotting.** Cells were lysed in RIPA buffer. Lysates were separated by SDS-PAGE and transferred to PVDF membrane. The membrane was blocked with 5% BSA in TBST, and incubated with primary antibody overnight at 4°C. Primary antibodies include TRX1 antibody (Cell Signaling, 2429S) (1:1000 dilution), FLAG antibody (Sigma, F1804) (1:1000 dilution), GRX1 antibody (Santa Cruz, SC-293250) (1:1000 dilution), Actin antibody (Abcam, EPR16769) (1:1000 dilution), GCLC antibody (Boster Biological Technology, PA1492) (1:500 dilution), CSRP3 antibody (Abcam, ab172952), and  $\alpha$ -actinin antibody (Abcam, ab137346). Membrane was incubated with secondary HRP-antibody for 1 h at room temperature. Proteins were visualized by chemiluminescence.

**Pull-down of glutathionylated proteins.** Glutathionylation of individual proteins were detected by pull-down of glutathionylated proteins, followed by Western blotting with specific antibodies, as described previously.<sup>4</sup> Briefly, lysates containing glutathionylated proteins were precipitated by cold-acetone. Proteins were then re-dissolved in PBS and subjected to click reaction with biotin-alkyne (0.4 mM), CuBr (2 mM), and THPTA (2 mM) for 2 h at room temperature. Proteins in the mixture was then precipitated by cold acetone and re-dissolved in PBS containing 1.2% SDS. The resuspended proteins were then incubated with streptavidin-agarose for 3 h at room temperature. After washing with PBS (5 mL) three times, proteins on beads were eluted by an SDS-loading buffer, resolved on SDS-PAGE and analyzed by Western blotting.

**Sequence motif for glutathionylation.** Out of 1,767 glutathionylated peptides, 200 peptide sequences were randomly selected (every fifth one in alphabetically listed proteins). The total 17 amino acids containing 8 amino acids before and after glutathionylated Cys residue in individual peptides were aligned. The position of Cys was annotated to be 0. These sequences were then used to generate a frequency plot in the WebLogo online tools.<sup>5</sup>

## Supplementary References

1. Kramer, P. A.; Duan, J.; Gaffrey, M. J.; Shukla, A. K.; Wang, L.; Bammler, T. K.; Qian, W. J.; Marcinek, D. J., Fatiguing contractions increase protein S-glutathionylation occupancy in mouse skeletal muscle. *Redox Biol.* **2018**, *17*, 367-376.
2. Chen, Y. R.; Chen, C. L.; Pfeiffer, D. R.; Zweier, J. L. Mitochondrial Complex II in the Post-ischemic Heart, *J. Biol. Chem.* **2007**, *282*, 32640-32654.

3. Samarasinghe, K. T. G.; Munkanatta Godage, D. N.; VanHecke, G. C.; Ahn, Y. H. Metabolic Synthesis of Clickable Glutathione for Chemoselective Detection of Glutathionylation. *J. Am. Chem. Soc.* **2014**, *136*, 11566-11569.
4. Samarasinghe, K. T. G.; Munkanatta Godage, D. N.; Zhou, Y.; Ndombera, F. T.; Weerapana, E.; Ahn, Y. H. A clickable glutathione approach for identification of protein glutathionylation in response to glucose metabolism. *Mol. Biosyst.* **2016**, *12*, 2471-2480.
5. Crooks, G. E.; Hon, G.; Chandonia, J. M.; Brenner, S. E. WebLogo: A sequence logo generator. *Genome Res.* **2004**, *14*, 1188-1190
